# Supplementary material for: Jealousy as a Function of Rival Characteristics: Two Large Replication Studies and Meta-Analyses Support Gender Differences in Reactions to Rival Attractiveness But Not Dominance
Source: PubMed Central journal article supplement (PMC7493204; doi:10.1177/0146167220904512), 2020-03-10
Supplement: Pollet_Online_Appendix.pdf [file Pollet_Online_Appendix.pdf]

All the materials, data, and code underlying our paper can be found online at the OSF project pages:

[https://osf.io/zytdx/?view\\_only=e48db3ddebde41528741d04e814f44ff](https://osf.io/zytdx/?view_only=e48db3ddebde41528741d04e814f44ff) and

[https://osf.io/wd7zv/?view\\_only=6cd0b8ac87344a10a785a693b4041c12](https://osf.io/wd7zv/?view_only=6cd0b8ac87344a10a785a693b4041c12). They are not reproduced here due to length. All key materials are also summarised in text.
